# Supplementary material for: Advantage of fat-derived CD73 positive cells from multiple human tissues, prospective isolated mesenchymal stromal cells
Source: PubMed Central journal article supplement (PMC7493914; doi:10.1038/s41598-020-72012-8), 2020-09-15

**Advantage of fat-derived CD73 positive cells from multiple human tissues, prospective isolated mesenchymal stromal cells**

**Eriko G. Suto<sup>1,4</sup>, Yo Mabuchi<sup>1</sup>, Saki Toyota<sup>1</sup>, Miyu Taguchi<sup>1</sup>, Yuna Naraoka<sup>1,4</sup>, Natsumi Itakura<sup>1</sup>, Yoh Matsuoka<sup>2</sup>, Yasuhisa Fujii<sup>2</sup>, Naoyuki Miyasaka<sup>3</sup>, and Chihiro Akazawa<sup>1,4\*</sup>**

*<sup>1</sup>Department of Biochemistry and Biophysics, Graduate School of Health Care Sciences, Tokyo Medical and Dental University, Tokyo 113-8510, Japan*

*<sup>2</sup>Department of Urology, Tokyo Medical and Dental University, Tokyo 113-8510, Japan*

*<sup>3</sup>Department of Perinatal and Women's Medicine, Tokyo Medical and Dental University, Tokyo 113-8510, Japan*

*<sup>4</sup>Intractable Disease Research Centre, Juntendo University School of Medicine, Tokyo 113-8421, Japan*

\*Corresponding author

Chihiro Akazawa, MD, Ph.D.

Juntendo University Graduate School of Medicine, Intractable Disease Research Center, Hongo 2-1-1, Bunkyo-ku, Tokyo 113-8431, Japan

Phone number: +81+3-3814-5002, Fax number: +81+3-5802-0439

E-mail address: c.akazawa.gt@juntendo.ac.jp

## Supporting information

### S1 Figure Legends

**Figure S1.** The bar graph shows CD73<sup>+</sup> cells population in visceral fat from each patient. Representative profile of flow cytometric analysis for cell surface antigen CD73, CD31, CD45, and glycoprotein A (GPA).

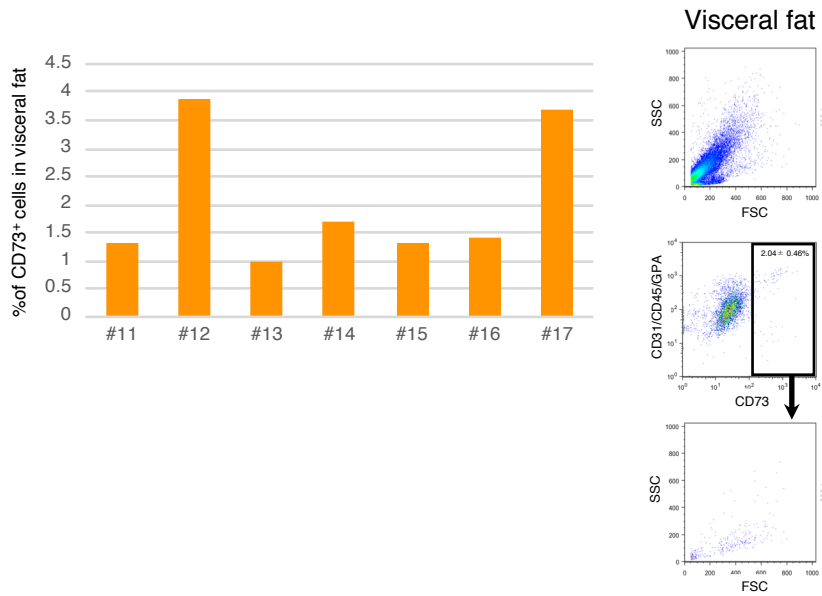

**Figure S2.** 2000 cells were seeded.(Only cells from umbilical cord #G907 were seeded 765 cells, because CD73+ cells population were rare in umbilical cord.)

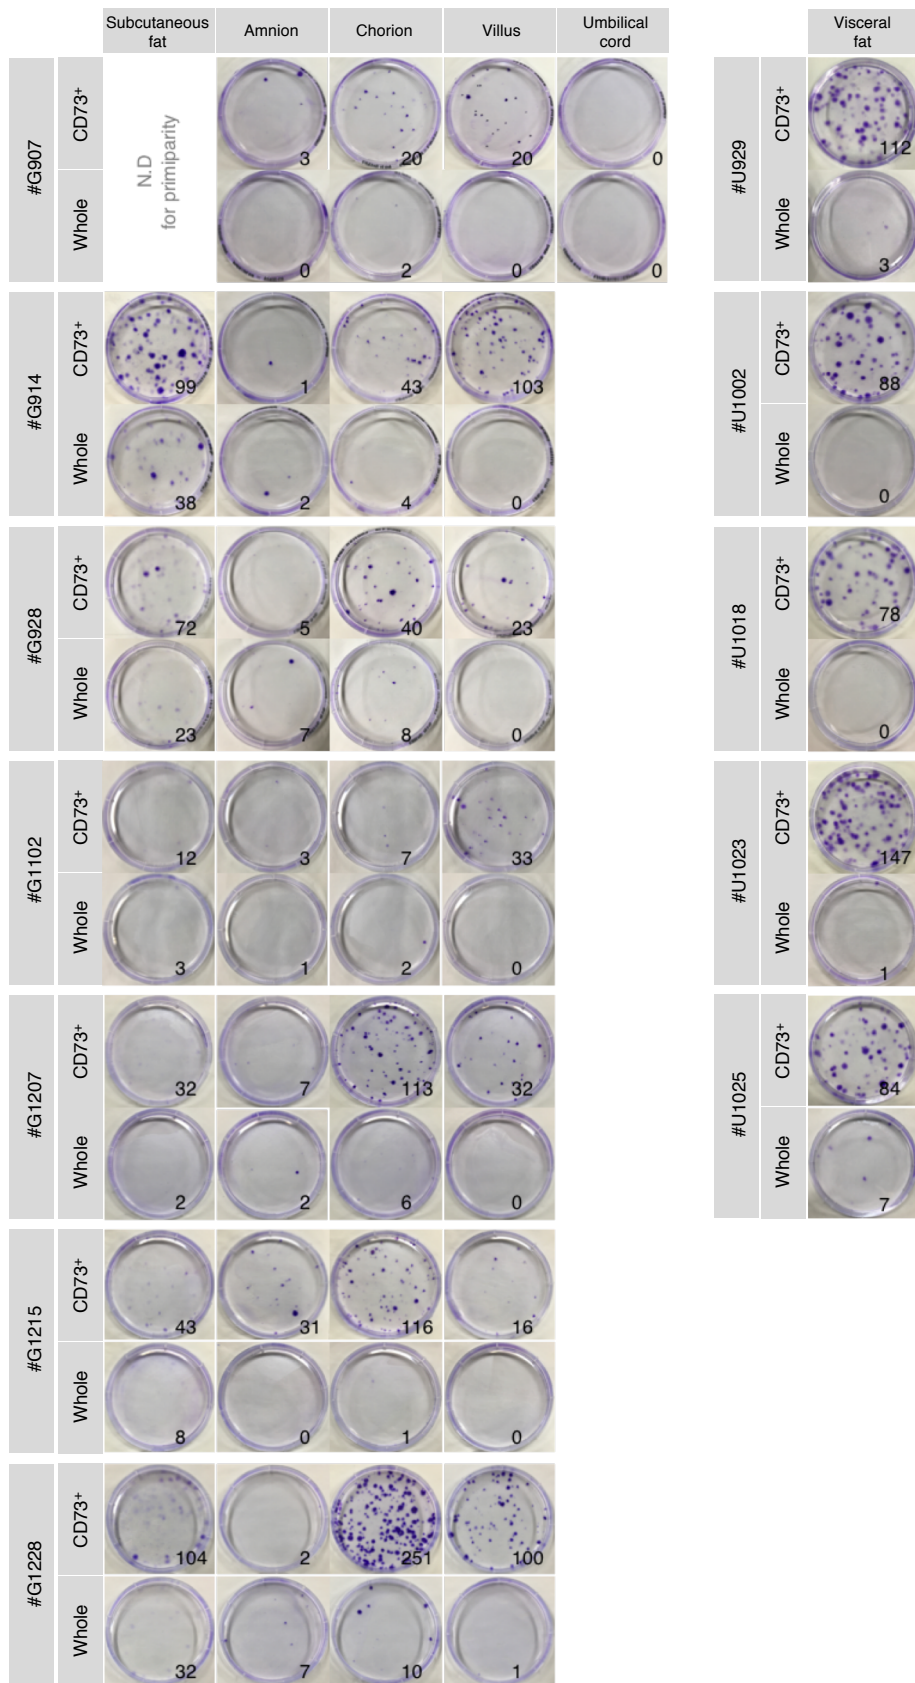

**Figure S3.** 14days after from first BLM administration, mouse lung was analyzed histologically. Sections were sliced (5- $\mu$ m thick) and stained with EVG, hematoxylin and eosin (HE), or immunofluorescent markers (IBA1, red and DAPI, blue).

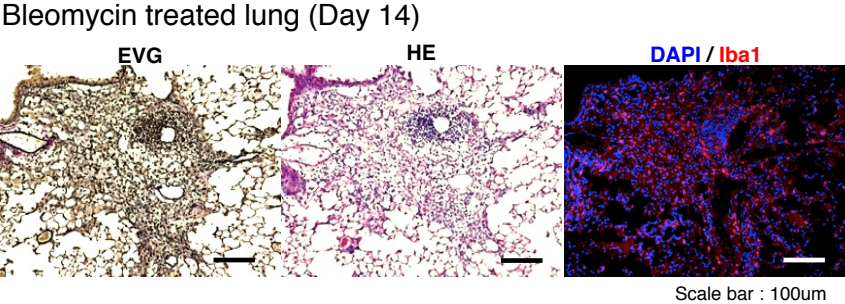

**Figure S4.** Flow cytometer analysis of infiltrated cells contained in BALF on day 28. Positive cell number of each cell surface marker was counted.

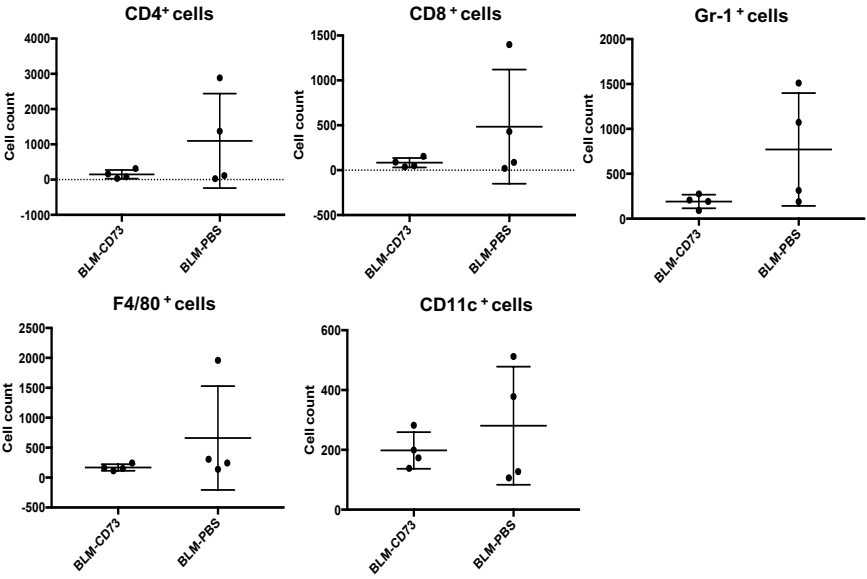

Supplement: 41598_2020_72012_MOESM1_ESM.pdf [file 41598_2020_72012_MOESM1_ESM.pdf]
